# Supplementary material for: Association of complication of type 2 diabetes mellitus with hemodynamics and exercise capacity in patients with heart failure with preserved ejection fraction: a case–control study in individuals aged 65–80 years
Source: Cardiovasc Diabetol. 2023 Apr 28;22:97. doi: 10.1186/s12933-023-01835-2 (PMC10148403; doi:10.1186/s12933-023-01835-2)
Supplement: Supplementary file 2 — Additional file 2: Cardiopulmonary exercise testing and hemodynamics data of all groups [file 12933_2023_1835_MOESM2_ESM.xlsx]

## Sheet: Additional file_2
Additional File 2. Cardiopulmonary exercise testing and hemodynamics data of all groups
Characteristics	Control (n=50)	HFpEF without T2DM (n=48)	HFpEF with T2DM (n=51)	P-value
Resting (Sitting posture)
RER	0.83 (IQR 0.82-0.84)	0.83 (IQR 0.82-0.84)	0.83 (IQR 0.83-0.84)	0.128
VO2 (mL/min/kg)	3.0 (IQR 2.9-3.4)	3.2 (IQR 3.0-3.5)	3.2 (IQR 2.8-3.5)	0.153
SI (mL/m2)	33.5 (IQR 31.7-35.8)	34.6 (IQR 31.3-37.3)	34.6 (IQR 32.4-36.9)	0.373
HR (bpm/min)	73 (IQR 68-76)	70 (IQR 69-77)	70 (IQR 69-75)	0.752
CI (L/min/m2)	2.4 (IQR 2.2-2.6)	2.5 (IQR 2.3-2.8)	2.5 (IQR 2.3-2.7)	0.492
a-vO2 diff (mL/100mL)	5.1 (IQR 4.8-5.3)	5.3 (IQR 4.9-5.7)	5.1 (IQR 4.5-5.5)	0.246
VO2/HR (mL/beat)	2.9 (IQR 2.7-3.3)	3.1 (IQR 2.9-3.4)	2.9 (IQR 2.6-3.4)	0.141
Anaerobic threshold
RER	1.00 (IQR 0.99-1.01)	1.00 (IQR 0.99-1.01)	1.00 (IQR 0.99-1.01)	0.854
VO2 (mL/min/kg)	20.8 (IQR 18.9-21.2)	10.6 (IQR 9.2-13.1) *	9.1 (IQR 7.9-10.0) *, †	<0.001
Work rate (watt)	81 (IQR 74-83)	59 (IQR 51-73) *	51 (IQR 44-56) *, †	<0.001
SI (mL/m2)	44.5 ± 4.8	44.4 ± 4.0	42.8 ± 3.7	0.094
HR (bpm/min)	146 (IQR 142-148)	105 (IQR 101-109) *	106 (IQR 98-114) *	<0.001
CI (L/min/m2)	6.5 (IQR 6.0-6.8)	4.7 (IQR 4.4-5.1) *	4.5 (IQR 4.2-4.9) *	<0.001
a-vO2 diff (mL/100mL)	12.5 (IQR 11.6-13.3)	9.1 (IQR 8.2-10.1) *	7.8 (IQR 7.2-8.4) *, †	<0.001
VO2/HR (mL/beat)	9.5 (IQR 8.7-10.4)	7.3 (IQR 6.2-8.1) *	5.8 (IQR 4.9-6.6) *, †	<0.001
Peak exercise
RER	1.12 (IQR 1.12-1.13)	1.13 (IQR 1.12-1.13)	1.12 (IQR 1.12-1.13)	0.506
VO2 (mL/min/kg)	23.5 (IQR 20.8-25.0)	15.1 (IQR 12.9-19.1) *	11.6 (IQR 10.1-13.2) *, †	<0.001
Work rate (watt)	112 (IQR 91-122)	84 (IQR 71-106) *	64 (IQR 56-73) *, †	<0.001
SI (mL/m2)	44.0 ± 4.7	44.4 ± 4.6	42.5 ± 3.4	0.053
HR (bpm/min)	165 (IQR 152-169)	132 (IQR 124-137) *	120 (IQR 111-130) *, †	<0.001
CI (L/min/m2)	7.1 (IQR 6.8-7.4)	5.9 (IQR 5.3-6.5) *	5.0 (IQR 4.5-5.6) *, †	<0.001
a-vO2 diff (mL/100mL)	13.1 (IQR 11.9-13.8)	10.6 (IQR 9.9-11.9) *	8.9 (IQR 8.6-9.5) *, †	<0.001
VO2/HR (mL/beat)	9.9 (IQR 8.6-10.8)	8.2 (IQR 7.2-9.7) *	6.4 (IQR 6.0-7.4) *, †	<0.001
Other indicators
ΔVO2/ΔWork rate (mL/min/work rate)	9.2 (IQR, 8.9-9.6)	8.2 (IQR, 7.9-8.6) *	7.9 (IQR, 7.5-8.2) *	<0.001
Minimum VE/VCO2 (mL/mL)	29.3 (IQR, 28.3-30.1)	32.8 (IQR, 32.0-33.8) *	36.4 (IQR, 34.3-37.8) *, †	<0.001
VE vs VCO2 slope	33.2 (IQR, 31.5-34.2)	35.0 (IQR, 34.4-35.7) *	38.2 (IQR, 37.7-39.6) *, †	<0.001
Percent of peak HR (%)	112 (IQR, 104-117)	89 (IQR, 85-95) *	82 (IQR, 78-89) *, †	<0.001
Chronotropic incompetence (%)	4	13	41 *, †	<0.001
HRR (beat)	26 (IQR, 22-28)	10 (IQR, 8-11) *	7 (IQR, 5-8) *, †	<0.001
Abnormality of HRR (%)	6	42 *	84 *, †	<0.001
Reason for end of exercise load
leveling off of VO2	0	0	0
SBP decreased by 10 mmHg with exercise load and SBP was 250 mmHg or more	28	25	31	0.78
RPER and RPEL >17	26	17	24	0.516
Pedal speed of <50 rpm	30	38	29	0.635
Request for termination from study participants	16	21	16	0.754
Normal distribution data are expressed as means ± standard deviations, non-normal distribution data are expressed as medians, and nominal variables are expressed as percentages. * P <0.05 vs the Control group, † P <0.05 vs the HFpEF-without-T2DM group. Abbreviations: HFpEF, heart failure with preserved ejection fraction; IQR, Interquartile range; RER, Respiratory exchange ratio; VO2, oxygen uptak…
