# Supplementary material for: Association of complication of type 2 diabetes mellitus with hemodynamics and exercise capacity in patients with heart failure with preserved ejection fraction: a case–control study in individuals aged 65–80 years
Source: Cardiovasc Diabetol. 2023 Apr 28;22:97. doi: 10.1186/s12933-023-01835-2 (PMC10148403; doi:10.1186/s12933-023-01835-2)
Supplement: Supplementary file 3 — Additional file 3: Exercise capacity and ventilatory equivalent versus carbon dioxide output slope according to left ventricular ejection fraction. Analysis of covariance was adjusted for the presence or absence of sarcopenia as well as hemoglobin level. * P <0.05 vs 50.0-55.0 group, † P <0.05 vs 55.1-60.0 group, ‡ P <0.05 vs 65.1-70.0 group, § P <0.05 vs >70.1 group. Abbreviations: peakVO2, peak oxygen uptake; VE vs VCO2 slope, Ventilatory equivalent versus carbon dioxide output slope. [file 12933_2023_1835_MOESM3_ESM.xlsx]

## Sheet: Additonal file₋3
	Additional File 3. Exercise capacity and ventilatory equivalent versus carbon dioxide output slope according to left ventricular ejection fraction
	Analysis of covariance was adjusted for the presence or absence of sarcopenia as well as hemoglobin level. * P <0.05 vs 50.0-55.0 group, † P <0.05 vs 55.1-60.0 group, ‡ P <0.05 vs 65.1-70.0 group, § P <0.05 vs >70.1 group. Abbreviations: peakVO2, peak oxygen uptake; VE vs VCO2 slope, VE vs VCO2 slope; Ventilatory equivalent versus carbon dioxide output slope
