# Supplementary material for: Association of complication of type 2 diabetes mellitus with hemodynamics and exercise capacity in patients with heart failure with preserved ejection fraction: a case–control study in individuals aged 65–80 years
Source: Cardiovasc Diabetol. 2023 Apr 28;22:97. doi: 10.1186/s12933-023-01835-2 (PMC10148403; doi:10.1186/s12933-023-01835-2)
Supplement: Supplementary file 4 — Additional file 4: Exercise capacity and work rate data of all groups. Analysis of covariance was adjusted for the presence or absence of sarcopenia as well as hemoglobin level. The HF groups consisted of 61 patients excluding H2FPEF score ≤5 and HFA-PEFF score ≤4. * P <0.05 vs the Control group, † P <0.05 vs the HFpEF without T2DM group. [file 12933_2023_1835_MOESM4_ESM.xlsx]

## Sheet: Additional file₋4
	Additional File 4. Exercise capacity and work rate data of all groups
