# Supplementary material for: Association of complication of type 2 diabetes mellitus with hemodynamics and exercise capacity in patients with heart failure with preserved ejection fraction: a case–control study in individuals aged 65–80 years
Source: Cardiovasc Diabetol. 2023 Apr 28;22:97. doi: 10.1186/s12933-023-01835-2 (PMC10148403; doi:10.1186/s12933-023-01835-2)
Supplement: Supplementary file 5 — Additional file 5: Hemodynamic data of all groups. Analysis of covariance was adjusted for medication of β-blocker as well as hemoglobin level. The HF groups consisted of 61 patients excluding H2FPEF score ≤5 and HFA-PEFF score ≤4. * P <0.05 vs the Control group, † P <0.05 vs the HFpEF without T2DM group. HFpEF, heart failure with preserved ejection fraction; T2DM, type 2 diabetes mellitus; CI, cardiac output index; SI, stroke volume index; HR, heart rate; a-vO2 diff, Arterial-venous oxygen difference; HRR, heart rate recovery; VE vs VCO2 slope, Ventilatory equivalent versus carbon dioxide output slope. [file 12933_2023_1835_MOESM5_ESM.xlsx]

## Sheet: Additional_file₋5
	Additional File 5. Hemodynamic data of all groups
